# Supplementary material
Source: PubMed Central journal article supplement (PMC4169955)
Supplement: pnas.201404058SI.pdf [file pnas.201404058SI.pdf]

# Supporting Information

Buzas et al. 10.1073/pnas.1404058111

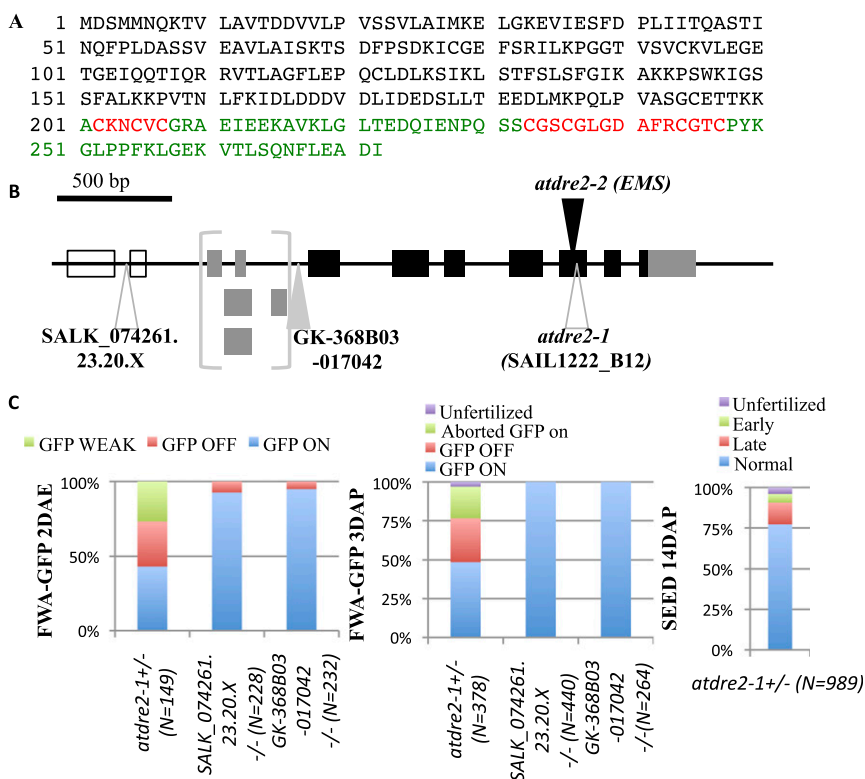

**Fig. S1. ALAC4 mapping and allele complementation.** (A) To identify the *ALAC4* gene, we identified recombinant F2 plants between *alac4<sup>-/-</sup>;pFWA-GFP* in the Col background and Ler, using dCAPs PCR markers (<http://helix.wustl.edu/dcaps>) designed to detect single nucleotide polymorphisms (<http://polymorph-clark20.weigelworld.org>). The coding regions of all of the 14 genes defined by the two closest recombination breakpoints were sequenced. The mutation creates a putative frameshift at amino acid 201 and a stop codon after a further 16 chimeric residues. Amino acids indicated in green and red are probably not translated. The conserved motifs for binding Fe-S clusters are indicated in red. (B) Sites of T-DNA insertions. (C) We introgressed T-DNA insertions in the genomic region of At5g18400 into the *pFWA-GFP* line. The line with the T-DNA insertion in the 5' upstream region (SALK\_074261; open triangle in the upstream gene) and the GABI-KAT line with the insertion in the first intron (GK-368B03; gray triangle) could be made homozygous and had no *FWA-GFP* phenotype before or after fertilization. Another T-DNA insertion site [SAIL\_1222, named *atdre2-1(6)*; open triangle in the coding region] was near the EMS mutation and shared with *atdre2-2* gametophytic lethality, *pFWA-GFP* inactivation (monitored at 2 DAE and 3 DAmP), and seed phenotypes (monitored at 14 DAmP).



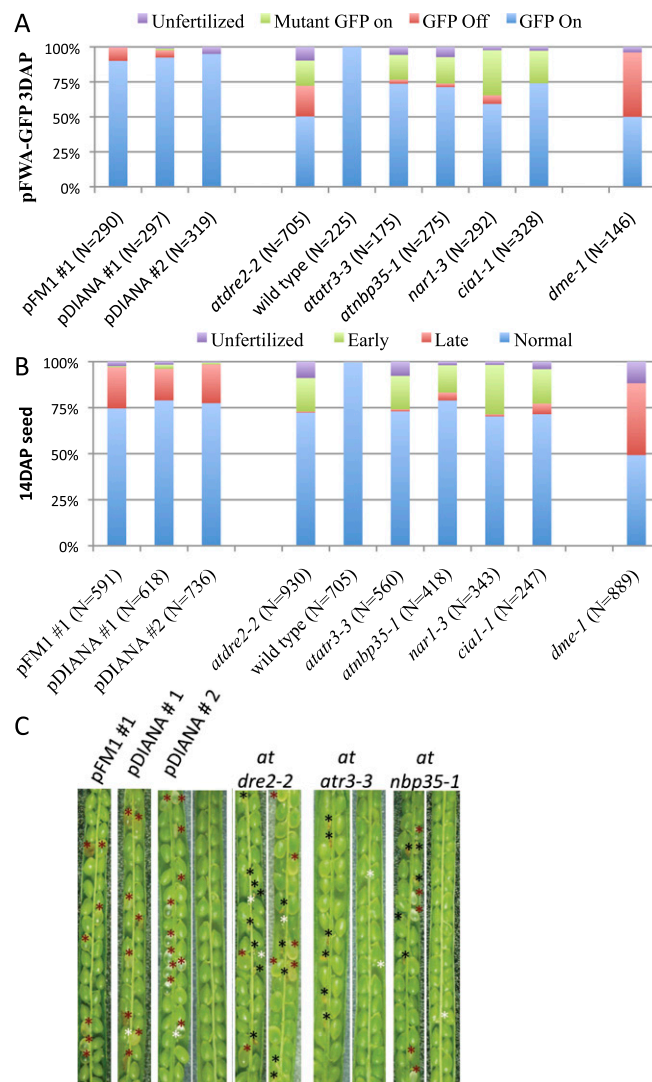

**Fig. S4.** *pFWA-GFP* and seed phenotype of transgenics and CIA mutants (corresponding to Fig. 3). (A) *FWA-GFP* in *atdre2-2<sup>+/-</sup>;pFM1:AtDRE2#1*, *atdre2-2<sup>+/-</sup>;pDIANA:AtDRE2#1*, *atdre2-2<sup>+/-</sup>;pDIANA:AtDRE2#2*, and CIA and DME mutants (*atdre2-2*, *atatr3-3*, *atnbp35-1*, *nar1-3*, *cia1-1*, and *dme-1*) at 3 DAmP. (B) Seed phenotype at 14 DAmP for the same genotypes. The numbers of ovules/seeds analyzed are indicated below each graph. (C) Seed phenotype in dissected siliques at 14 DAP (Left) or 14 DAmP with WT pollen (Right) in the indicated genotypes. White asterisks, unfertilized seeds; black asterisks, early-aborted seeds; red asterisks, late-aborted seeds.



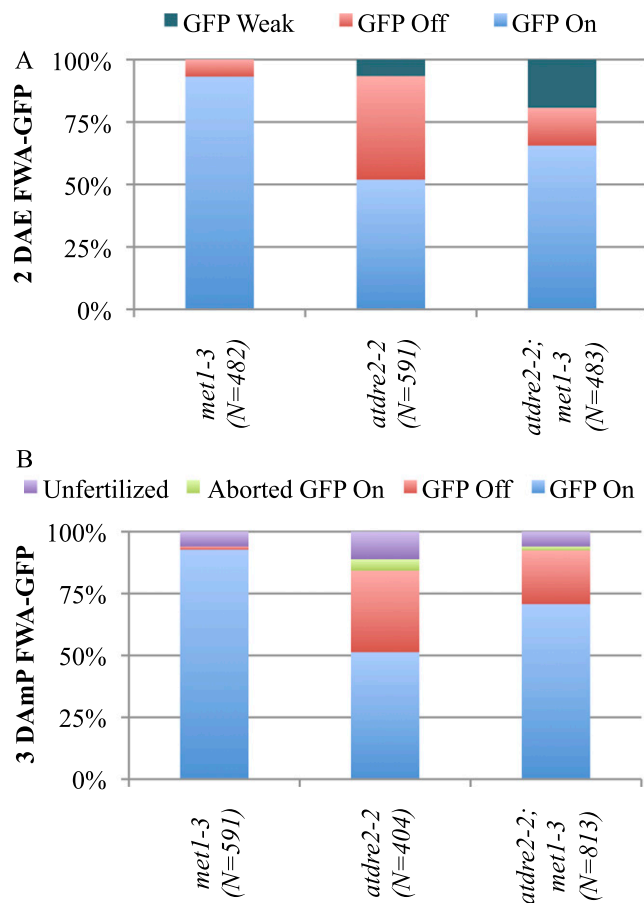

**Fig. S6.** Genetic interaction between *atdre2-2<sup>+/-</sup>* and *met1-3<sup>+/-</sup>* monitored in double mutants by FWA-GFP at 2 DAE (A) and 3 DAmP (B). N represents numbers of ovules/seeds analyzed.

**Table S1.** Seed phenotype in self and reciprocal crosses between *atdre2-2;pFWA-GFP* and *pFWA-GFP*

| Parental genotype                 | n   | %     |              |               |              |
|-----------------------------------|-----|-------|--------------|---------------|--------------|
|                                   |     | WT    | Late aborted | Early aborted | Unfertilized |
| pFWA-GFP                          | 895 | 96.7  | 0.3          | 0.4           | 2.5          |
| <i>atdre2-2</i> self set 1        | 491 | 68.3  | 16.5         | 5.6           | 9.6          |
| <i>atdre2-2</i> self set 2        | 930 | 72.36 | 0.62         | 18.15         | 8.86         |
| pFWA-GFP × pFWA-GFP               | 668 | 89.9  | 1.3          | 3.7           | 5.2          |
| <i>atdre2-2</i> × <i>atdre2-2</i> | 710 | 70.0* | 5.0*         | 12.9*         | 12.1*        |
| <i>atdre2-2</i> × pFWA-GFP        | 775 | 75.1* | 9.8*         | 3.0           | 12.1*        |
| pFWA-GFP × <i>atdre2-2</i>        | 689 | 83.6  | 3.7*         | 1.9           | 10.9         |

While investigating the distinct *atdre2-2<sup>+/-</sup>* seed phenotypes and the gametophytic vs. zygotic nature of the defects in detail, we found that the percentage of each mutant seed class varied among experiments (see, e.g., set 1 and set 2), whereas the total mutant seed percentage was less variable. Seed phenotype was analyzed at 14 d after self or manual pollination. *P* values were calculated relative to the WT control, and the values that reject the null hypothesis are indicated with asterisks. *n* indicates the number of seeds analyzed for each genetic background.

**Table S2. Transmission of single and double mutants**

| Parental genotype       |                         | <i>n</i> |    |                 |               |                        | $\lambda^2$ |
|-------------------------|-------------------------|----------|----|-----------------|---------------|------------------------|-------------|
| ♀                       | ♂                       |          | WT | <i>atdre2-2</i> | <i>met1-3</i> | <i>atdre2-2;met1-3</i> |             |
| <i>atdre2-2</i>         | WT                      | 107      | 78 | 22              | —             | —                      | 32.53       |
| WT                      | <i>atdre2-2</i>         | 94       | 83 | 17              | —             | —                      | 40.89       |
| <i>atdre2-2; met1-3</i> | WT                      | 152      | 34 | 28              | 22            | 16                     | 9.73        |
| WT                      | <i>atdre2-2; met1-3</i> | 103      | 47 | 13              | 28            | 12                     | 35.05       |

*n* indicates the number of seedlings genotyped.  $\lambda^2$  was calculated based on expected ratios of 1:1 for single mutants and 1:1:1:1 for double mutants.

**Table S3. Oligonucleotides used in this study**

| Oligo name                              | Used for                      |
|-----------------------------------------|-------------------------------|
| <b>Vector construction</b>              |                               |
| CACCGGCCTTCTACCACCTTA                   | <i>pAtDRE:2DRE2-EGFP</i>      |
| TATGTCAGCTTCAAGGAAGTTTT                 |                               |
| CACCGGCCTTCTACCACCTTA                   | <i>pAtDRE2:DRE2-NLS-EGFP</i>  |
| ACCTTTCTCTTCTTCTTAGGTATGTCAGCTTCAAGGAAG |                               |
| GAGCTCGGTACCATACTAGCATGTATCCAC          | <i>pFM1:AtDRE2</i>            |
| GGGAGCTCGGTACCTGGAACCTTATCGGTTTT        |                               |
| GGTACCCACCTGACAAATGCCCGAAACC            | <i>pDIANA:AtDRE2</i>          |
| TACGGGTACCTTGTAATTACTCGGCTTGCC          |                               |
| <b>Gene expression</b>                  |                               |
| GTGACTCTGGTCAAGACT                      | <i>FWA</i>                    |
| TTGGTTCCACCAGAACCGGTA                   |                               |
| TCCTCGCCCTTGCTCACCAT                    | <i>FWA-GFP</i>                |
| GCGCACTGCTTATCAAACCTCAAGAACT            |                               |
| ACATGCAGAGCGGTGCGAGG                    | <i>FIS2</i>                   |
| ACATGCAGAGCGGTGCGAGG                    |                               |
| TGATCTGGTCGTGCGGCGTG                    | <i>MEA</i>                    |
| TTTGACCAAAAATCACAGG                     |                               |
| CCATTGCCTCTTTGACCATT                    | <i>mPAC</i>                   |
| CTTCGCTGGATCTAGACTCGGGCTC               |                               |
| GCCCGATGCTCACTCCAAGGTAATG               | <i>HDG8</i>                   |
| GGGTGGTTGACCGGCTCAAT                    |                               |
| TGGTTTGCCCTCCATGTGGTGG                  | <i>HDG9</i>                   |
| GGTGTGGCCTCGACGTTATGCA                  |                               |
| TTCTCTCAATTCTCTCTACCGT                  | <i>UBIQUITIN10</i>            |
| TGGCCTTAACGTTGTCGA                      |                               |
| TCCTCTGGCGAGGAGCTTCA                    | <i>FIE</i>                    |
| GGAGGGCAACTTTTCAAATCCCAGACA             |                               |
| TGCCAACTCCTCTCCCCGCA                    | <i>FUS3</i>                   |
| AGCTCCGCGGCTTCTTCG                      |                               |
| <b>McrBC assay</b>                      |                               |
| AAACAACAAAATCTGATTGTCAAGTATC            | <i>FWA</i>                    |
| ATTCATACGAGCACCGCTTTACG                 |                               |
| GTTGATTACCAAAACCCGAGAAGA                | <i>FIS2</i>                   |
| GATTTACTTTATGATTTCCGACGCGG              |                               |
| TCGCGATGACAACCTCAAGTG                   | <i>HDG9</i>                   |
| AGACGTCGCTGAAATTCGTC                    |                               |
| CACCGTAATCGTAGTCTAGCCA                  | <i>HDG8</i>                   |
| AGGTGTGTAGCATGAGGAAAGAA                 |                               |
| AAGCCAGCGCTATCACTAACTTT                 | <i>FLC (internal control)</i> |
| TCGGCAGATTGAAAATGACATT                  |                               |
| GGCTCTAAGAGGGTGTGAA                     | <i>Ler-specific locus</i>     |
| TACCACCACCTCACACCAA                     |                               |
